# Supplementary material
Source: publisher figshare collection journal article supplement (https://sage.figshare.com/ndownloader/files/24697764)
Supplement: Supplementary file 1 [file 24697764]

## Supplementary material: Models

Notes: The constant is the starting point for the calculation of all observations of the study, which has no particular meaning in it. The lower the significance of a variable, the greater is the probability that it has an association with the co-presence, and is not a result found by pure chance. Finally, the generalized coefficient of determination ( $R_G^2$ ) measures, in a range from zero (minimum) to one (maximum), the total variation explained by the model, i.e., its quality.

**Table 1:** Model of "moving pedestrians on an atypical day - route 1". Source: Authors.

| Variable                | Estimative | Standard deviation | Significance |
|-------------------------|------------|--------------------|--------------|
| (Constant)              | -3,846e+00 | 5,945e-01          | 0,1%         |
| Residential units/m     | 1,103e+01  | 3,448e+00          | 1%           |
| Connectivity            | 2,590e-01  | 9,361e-02          | 5%           |
| Choice R1000m           | 4,358e-04  | 1,217e-04          | 1%           |
| Integration R1000m      | 1,238e-08  | 4,751e-09          | 5%           |
| Windows of all floors/m | -3,996e+00 | 2,003e+00          | 10%          |

$$R_G^2 = 0,846$$

**Table 2:** Model of "moving pedestrians on a typical day - route 1". Source: Authors.

| Variable           | Estimative | Standard deviation | Significance |
|--------------------|------------|--------------------|--------------|
| (Constant)         | -2,133e+00 | 7,415e-01          | 5%           |
| Garages/m          | 1,006e+01  | 4,486e+00          | 5%           |
| Choice R1000m      | 9,083e-04  | 2,424e-04          | 1%           |
| Integration R1000m | 1,564e-08  | 4,933e-09          | 1%           |
| Global choice      | -3,359e-06 | 1,203e-06          | 5%           |
| Constitutions/m    | -9,455e+00 | 5,141e+00          | 10%          |

$$R_G^2 = 0,692$$

**Table 3:** Model of "static pedestrians on an atypical day - route 1". Source: Authors.

| Variable           | Estimative | Standard deviation | Significance |
|--------------------|------------|--------------------|--------------|
| (Constant)         | -8,979e+00 | 5,426e-01          | 0,1%         |
| Service units/m    | 1,410e+02  | 3,973e+01          | 1%           |
| Constitutions/m    | 4,284e+01  | 4,337e+00          | 0,1%         |
| Commercial units/m | 3,374e+01  | 1,254e+01          | 5%           |
| Garages/m          | 1,231e+01  | 3,433e+00          | 1%           |
| Connectivity       | 8,830e-01  | 8,433e-02          | 0,1%         |
| Integration R1000m | 2,155e-08  | 3,167e-09          | 0,1%         |

|                         |            |           |      |
|-------------------------|------------|-----------|------|
| Global integration      | 6,742e-09  | 3,214e-09 | 10%  |
| Choice R1000m           | -2,977e-04 | 9,940e-05 | 5%   |
| Windows of all floors/m | -1,310e+01 | 1,779e+00 | 0,1% |
| $R_G^2 = 0,969$         |            |           |      |

**Table 4:** Model of "static pedestrians on a typical day - route 1". Source: Authors.

| Variable                | Estimative | Standard deviation | Significance |
|-------------------------|------------|--------------------|--------------|
| (Constant)              | -4,868e+00 | 1,106e+00          | 1%           |
| Service units/m         | 1,321e+02  | 6,222e+01          | 10%          |
| Constitutions/m         | 1,798e+01  | 6,677e+00          | 5%           |
| Connectivity            | 5,289e-01  | 1,298e-01          | 1%           |
| Choice R1000m           | 5,362e-04  | 2,614e-04          | 10%          |
| Integration R1000m      | 2,138e-08  | 4,867e-09          | 1%           |
| Global integration      | 9,687e-09  | 4,865e-09          | 10%          |
| Global choice           | -2,340e-06 | 1,264e-06          | 10%          |
| Windows of all floors/m | -7,062e+00 | 2,658e+00          | 5%           |
| $R_G^2 = 0,818$         |            |                    |              |

**Table 5:** Model of "moving pedestrians on an atypical day - route 2". Source: Authors.

| Variable           | Estimative | Standard deviation | Significance |
|--------------------|------------|--------------------|--------------|
| (Constant)         | -1,553e+00 | 1,412e-01          | 0,1%         |
| Commercial units/m | 3,087e+01  | 6,312e+00          | 0,1%         |
| Global choice      | 1,517e-07  | 6,065e-08          | 5%           |
| $R_G^2 = 0,68$     |            |                    |              |

**Table 6:** Model of "moving pedestrians on a typical day - route 2". Source: Authors.

| Variable                | Estimative | Standard deviation | Significance |
|-------------------------|------------|--------------------|--------------|
| (Constant)              | -1,324e+00 | 5,437e-01          | 5%           |
| Commercial units/m      | 3,485e+01  | 7,010e+00          | 0,1%         |
| Windows of all floors/m | 1,917e+00  | 9,632e-01          | 10%          |
| Global integration      | 3,859e-08  | 2,449e-08          | 15%          |
| Integration R1000m      | -1,279e-08 | 4,689e-09          | 5%           |
| $R_G^2 = 0,728$         |            |                    |              |

**Table 7:** Model of "static pedestrians on an atypical day - route 2". Source: Authors.

| Variable | Estimative | Standard | Significance |
|----------|------------|----------|--------------|
|----------|------------|----------|--------------|

|                     |         | deviation |      |
|---------------------|---------|-----------|------|
| (Constant)          | -1,4369 | 0,3468    | 0,1% |
| Commercial units/m  | 25,7555 | 8,7521    | 1%   |
| Residential units/m | 2,9808  | 1,5754    | 10%  |

$$R_G^2 = 0,48$$

**Table 8:** Model of "static pedestrians on a typical day - route 2". Source: Authors.

| Variable           | Estimative | Standard deviation | Significance |
|--------------------|------------|--------------------|--------------|
| (Constant)         | 1,204e+00  | 8,690e-01          | 5%           |
| Commercial units/m | 4,829e+01  | 1,178e+01          | 0,1%         |
| Constitutions/m    | 3,863e+00  | 2,088e+00          | 5%           |
| Global integration | 4,476e-08  | 1,952e-08          | 5%           |
| Integration R1000m | -1,724e-08 | 4,723e-09          | 1%           |
| Choice R1000m      | -8,003e-04 | 3,547e-04          | 5%           |
| Connectivity       | -2,711e-01 | 1,532e-01          | 10%          |

$$R_G^2 = 0,746$$
